# Supplementary material for: A deep learning model for the prediction of pathogenic POLE mutations and microsatellite instability in colorectal cancer from digital pathology images
Source: Research Square preprint supplement (doi:10.21203/rs.3.rs-6692980/v1), 2025-07-31
Supplement: Supplementary file 1 [file add6a9d0a8f6356d6a1ac3d5.docx]

# Supplementary Methods

## Explanation of Data Domain and Domain Generalization

In machine learning, particularly in the context of domain generalization, the term "domain" refers to the source of data or the environment from which the data is drawn, which includes a specific distribution of features, patterns, and possibly labels. Each domain has its own characteristics and statistical properties. The multi-source training data and biased joint distribution of data categories and sources in this study are relevant to the domain generalization problem. Domain generalization is a scenario where a model is trained on data from one or more source domains to perform well on a target domain that it has not seen during training. The goal is to learn a model that can generalize well to any new domain. The challenge is that the model must learn features that are invariant across the various domains, ignoring domain-specific noise and capturing only the essence of the data that is consistent and predictive across all domains.

## Introduction of the CLAM Model

Considering recent progress in computer-aided diagnosis and deep learning algorithms, some recent works have already tried to accomplish histopathological image classification tasks with deep learning methods. The key challenge comes from the gigapixels of the histopathological images, which is unaffordable for any off-the-shelf deep learning method designed for natural images. Therefore, the Multi-Instance Learning (MIL) framework has been widely adopted, and previous works were mainly based on simple local-level predicting and global-level averaging diagrams in MIL. However, as for the differentiation of the MSS, MSI-H, and POLE mutations, it is hard to make decisions for every single patch. Moreover, simply aggregating patch-level classification results by numerical averaging is not enough to capture contextual information, which is critical for molecular classification. Furthermore, the training data is limited because of the rarity of MSI-H and pathogenic POLE mutations. Therefore, in this paper, our model is developed based on the attention-based dual-level MIL classification model CLAM which performs well on different WSI classification tasks and remains robust in the scarcity of training data.

The CLAM model accordingly conducts one global slide classification task and another local-level patch diagnostic relevance prediction task on the given input pre-extracted patch feature vectors for each slide. The CLAM model contains two variants, CLAM-SB and CLAM-MB, whose differences lie in the aggregation of patch features and the final classification strategy.

In the global-level slide classification task, for each class that the slide could be classified as the model employs an attention sub-network to learn how to assign attention weights to each feature vector. It subsequently aggregates the patch features through a weighted sum to form a comprehensive representation feature vector for the entire slide (CLAM-SB) or each target class (CLAM-MB) for the global classification of the entire slide. Therefore, only one global-level feature is obtained in CLAM-SB representing the entire slide with the patch-wise attention mechanism, and the final classification is conducted with a multi-class classifier implemented by a Multi-Layer Perceptron (MLP); and multiple global-level feature vectors are obtained in CLAM-MB, with one feature for each class, and the final results are obtained by several binary classifiers. For example, in the ternary classification task, CLAM-MB will produce three global-level features, and three binary classifiers are used to classify the slide into each class. As CLAM-MB can focus on different image characteristics for different classes, it fits the multi-category classification tasks better. As illustrated in the visualization results in the main paper, different classes have different attention distributions in the ternary classification, which indicates that the model focuses on different image characteristics for different classes.

Besides the global-level task, an additional local-level prediction task is further designed to improve the model performance based on the attention mechanism. For the entire slide (CLAM-SB) or each class (CLAM-MB), patches with the highest attention scores can be regarded as strong positive or strong negative evidence for the final classification result. Therefore, a local patch diagnostic significance prediction task can be conducted based on the patch-wise attention scores, in which patches with the highest attention scores can be seen as “diagnostic”, and a "diagnostic" pseudo label can be assigned to top- patches with the highest attention scores, while patches with the lowest attention scores can be seen as “non-diagnostic”, and a “non-diagnostic” pseudo label can be assigned to the top- patches with the lowest attention scores. A local-level predictor is trained to classify these patches into “diagnostic” or “non-diagnostic”.

## Cross-Domain Feature Alignment and Adversarial Training

To thoroughly eliminate domain-specific characteristics in the multi-source training WSIs, in this paper, we propose the multi-level cross-domain feature alignment method. The multi-level cross-domain feature alignment techniques consist of the local-level patch-wise alignment to ensure detailed patch feature consistency across different data sources, the feature-level prototypical alignment to aggregate patches with attention mechanism and construct prototypes to adaptively extract holistic features representing domain-specific general characteristics, and the global-level slide-wise alignment to directly calibrate the final slide feature for final classification, and are developed based on the domain discriminator and adversarial training method. The optimization objective of the domain discriminator is to distinguish from which data domain its input features are collected and refine the input features to be domain-specific. This objective contrasts with the cross-domain generalizable model, which aims to acquire domain-invariant features. Therefore, the adversarial training method is proposed to reconcile this contradiction, in which gradient reversal layers (GRLs) are integrated before the domain discriminators and reverse the gradients back-propagated from the discriminators, thus tuning the model to learn robust domain-invariant features (opposite to the domain discriminators optimizing goal). In cross-domain adversarial training, components placed after the GRL are trained to become more domain-specific, while components before the GRL are trained to be domain-invariant.

As introduced below, cross-domain feature alignment is conducted at different levels. By aligning the multi-level features and patches from the WSIs, the model ensures that cross-domain variabilities can be thoughtfully removed and generalization performance can be improved.

- **Local-Level Patch-wise Alignment:** This technique focuses on the consistency of localized image features in small patches from the WSIs across different data sources. It ensures that patches containing similar contents from different domains are aligned in feature space, which helps the model learn to recognize these patches regardless of their domain. This level of alignment is crucial for maintaining the integrity of the localized and subtle diagnostic features. The local-level patch-wise alignment is performed by applying a domain discriminator to each patch feature accordingly. The domain discriminator is implemented by an MLP, and a GRL is inserted before the domain discriminator. With the gradient-reversed domain discriminator, the patch features are trained to confuse the domain discriminator and to be domain-agnostic, and with the following parts of the pathologic classification network, the features are trained to be diagnostic at the same time.
- **Feature-level Prototypical Alignment:** At a higher level, this technique involves aggregating patches based on patch-wise attention to form “prototypes”. These prototypes represent the general characteristics of a domain and are used to extract holistic features that are domain-specific. Therefore, the entire domain discriminator, comprising an attention-based aggregation module to adaptively extract a feature vector rich in domain-specific information from all patch features, and an MLP for classification, together with a GRL, is applied to all patch features. By such means, domain-specific characteristics can be removed from features before the GRL. The adaptive nature of this alignment allows the model to dynamically adjust feature extraction concerning different inputs, thereby enhancing the model's ability to generalize.
- **Global-Level Slide-wise Alignment:** The final technique operates at the highest level by aligning the overall slide features for molecular classification. This global alignment ensures that the final, comprehensive features used for classifying an entire slide are diagnostic and consistent across different domains, which is crucial for the model’s performance on the final task. Besides the POLEmut/MSI-H/MSS&TMB-L classifier, a gradient-reversed domain discriminator is additionally applied to the final slide feature in a multi-task manner.

The model is trained in a multi-task manner with the POLEmut/MSI-H/MSS&TMB-L classification and the data source identification tasks, and both pathologic labels and data source labels are required. The model performs five tasks in total: molecular classification for the entire slide, diagnostic relevance prediction for each patch, and the three alignment techniques, each with a loss value to compute. The loss values are added and optimized simultaneously.

By integrating these comprehensive alignment methods conducted at different levels with cross-domain adversarial training, the CDA-CLAM model is trained to identify and emphasize the most informative features for the POLE mutation prediction, irrespective of their domain of origin, and address the challenges posed by dataset biases and data source variability in gene mutation classifications.

## Dataset Description of Camelyon17

The publicly available training set of the Camelyon17 dataset is included in our study to validate the deep learning model's performance in distinguishing data sources for various datasets. Camelyon17 is a publicly available dataset for the automated detection and classification of breast cancer metastases in H&E-stained WSIs of histological lymph node sections. The dataset is collected from 5 medical centers in the Netherlands. The training set is composed of 500 slides, 100 slides from each institution. The negative/positive labels and data-source labels are only provided for the training set. In this study, we focus on the data-source label to evaluate the model's performance in distinguishing data sources, and therefore, only the training set with data-source label available is used. For more detailed descriptions of the Camelyon17 dataset, please refer to the official website of the Camelyon17 challenge (https://camelyon17.grand-challenge.org/Data/).

# Supplementary Results

## POLE mutants and TMB of internal *POLE* dataset

**Supplementary Table 1 POLE mutants and TMB of the internal *POLE* dataset**

| **Sample ID** | **Exon rank** | **Mutation** | **TMB**  **(muts/MB)** | **MSI status(by NGS methods)** |
| --- | --- | --- | --- | --- |
| RS1707149FFP | 9 | p.P286R | N/A | MSS |
| RS19022465FFP | 9 | p.P286R | 719 | MSS |
| RS19032639FFP | 9 | p.P286R | N/A | MSS |
| RS19045942FFP | 9 | p.P286R | 446 | MSS |
| RS20023172FFP | 9 | p.P286R | 305·08 | MSS |
| RS20027535TIS | 9 | p.P286R | 245·26 | MSS |
| RS21000404FFP | 9 | p.P286R | 266·2 | MSS |
| RS21000408FFP | 9 | p.p436R | 409·77 | MSS |
| RS21002804FFP | 9 | p.P286R | 171·49 | MSS |
| RS21010980FFP | 9 | p.P286R | 388·83 | MSS |
| RS21026294FFP | 9 | p.P286R | 276·17 | MSS |
| RS210626296 | 9 | p.P286R | 354·94 | MSS |
| RS20126297FFP | 9 | p.P286R | 296·11 | MSS |
| RS21026298 | 9 | p.P286R | 534·4 | MSS |
| RS21029405FFP | 9 | p.P286R | 199·4 | MSS |
| RS21031385FFP | 9 | p.P286R | 462·61 | MSS |
| RS21041493FFP | 9 | p.P286R | 385·84 | MSS |
| RS21041494FFP | 9 | p.P286R | 195·41 | MSS |
| RS21041496FFP | 9 | p.P286R | 339·98 | MSS |
| RS21041498FFP | 9 | p.P286R | 204·39 | MSS |
| S2039973 | 9 | p.P286R | 221·79 | MSS |
| CP60003446 | 9 | p.P286R | N/A | MSS |
| CP60006791 | 9 | p.P286R | N/A | MSS |
| CP60007027 | 9 | p.P286R | N/A | MSS |
| CP60016342 | 9 | p.P286R | 200 | MSS |
| CP60016879 | 9 | p.P286R | N/A | MSS |
| CP60019570 | 9 | p.P286R | N/A | MSS |
| CP60023126 | 9 | p.P286R | N/A | MSS |
| CP70003785 | 9 | p.P286R | 243·548 | MSS |
| CP70005186 | 9 | p.P286R | N/A | MSS |
| CP70005417 | 9 | p.P286R | 391·935 | MSS |
| CP70007268 | 9 | p.P286R | N/A | MSS |
| CP70007815 | 9 | p.P286R | N/A | MSS |
| CP70021990 | 9 | p.P286R | N/A | MSS |
| CP70024538 | 9 | p.P286R | N/A | MSS |
| CP70029937 | 9 | p.P286R | 218·548 | MSS |
| CP70030117 | 9 | p.P286R | N/A | MSS |
| CP70030172 | 9 | p.P286R | N/A | MSS |
| CP70030990 | 9 | p.P286R | 400 | MSS |
| CP70035731 | 9 | p.P286R | N/A | MSS |
| CP70036555 | 9 | p.P286R | N/A | MSS |
| CP70036625 | 9 | p.P286R | N/A | MSS |
| CP70037667 | 9 | p.P286R | 313·966 | MSS |
| CP70040967 | 9 | p.P286R | N/A | MSS |
| CP70041500 | 9 | p.P286R | N/A | MSS |
| CP70044571 | 9 | p.P286R | N/A | MSS |
| CP70046332 | 9 | p.P286R | N/A | MSS |
| CP70046439 | 9 | p.P286R | 324·581 | MSS |
| CP70047930 | 9 | p.P286R | 235·196 | MSS |
| CP70048207 | 9 | p.P286R | N/A | MSS |
| CP70050242 | 9 | p.P286R | 168·715 | MSS |
| CP70054434 | 9 | p.P286R | 332·402 | MSS |
| CP70054990 | 9 | p.P286R | N/A | MSS |
| P193927 | 9 | p.P286R | 183·11 | MSS |
| P195200 | 9 | p.P286R | 272·92 | MSS |
| P197188 | 9 | p.P286R | 195·65 | MSS |
| P207020 | 9 | p.P286R | 115·8 | MSS |
| P219716 | 9 | p.P286R | 107·03 | MSS |
| P227158 | 9 | p.P286R | 335·24 | MSS |
| RS22013897FFP | 9 | p.P286R | 44·87 | MSS |
| RS22013911FFP | 9 | p.P286R | 341·97 | MSS |
| 255765 | 9 | p.P286R | N/A | MSS |
| 260216 | 9 | p.P286R | N/A | MSS |
| RS1724507FFP | 9 | p.S297F | N/A | MSS |
| RS21026267FFP | 9 | p.S297F | 273·18 | MSS |
| CP60012061 | 9 | p.S297Y | N/A | MSS |
| CP70030435 | 9 | p.S297Y | 384·916 | MSS |
| CP70031381 | 9 | p.S297F | N/A | MSS |
| CP70034548 | 9 | p.S297F | N/A | MSS |
| RS21010978FFP | 11 | p.p367V | 383·83 | MSS |
| RS1819517FFP | 13 | p.V411L | 251·59 | MSS |
| RS1831592FFP | 13 | p.V411L | N/A | MSS |
| RS20019503FFP | 13 | p.V411L | N/A | MSS |
| RS20039725TIS | 13 | p.V411L | 245·26 | MSS |
| RS20054564TIS | 13 | p.V411L | 184·45 | MSS |
| RS20058381FFP | 13 | p.V411L | 232·3 | MSS |
| RS20058382FFP | 13 | p.V411L | 368·67 | MSS |
| RS21026283FFP | 13 | p.V411L | N/A | MSS |
| RS2106286FFP | 13 | p.V411L | 227·32 | MSS |
| RS21026303FFP | 13 | p.V411L | 252·24 | MSS |
| RS21029409FFP | 13 | p.V411L | 151·55 | MSS |
| 2020-06835-1 | 13 | p.V411L | 315·05 | MSS |
| 22848 | 13 | p.V411L | 423·73 | MSS |
| CP10003817 | 13 | p.V411L | 197·331 | MSS |
| CP50005938 | 13 | p.V411L | N/A | MSS |
| CP60010076 | 13 | p.V411L | N/A | MSS |
| CP70005653 | 13 | p.V411L | N/A | MSS |
| CP70008593 | 13 | p.V411L | N/A | MSS |
| CP70020681 | 13 | p.V411L | N/A | MSS |
| CP70024351 | 13 | p.V411L | 278·771 | MSS |
| CP70027380 | 13 | p.V411L | N/A | MSS |
| CP70042177 | 13 | p.V411L | 256·425 | MSS |
| CP70044365 | 13 | p.V411L | N/A | MSS |
| CP70047002 | 13 | p.V411L | 259·218 | MSS |
| P207325 | 13 | p.V411L | 181·38 | MSS |
| P224738 | 13 | p.V411L | 267·88 | MSS |
| T0014682 | 13 | p.V411L | 163·04 | MSS |
| 255765 | 13 | p.V411L | 290·4 | MSS |
| 236859 | 13 | p.V411L | N/A | MSS |
| CP70024427 | 13 | p.V411L | 378·226 | MSS |
| 84374 | 13 | p.L424I | 91·6 | MSS |
| CP50004918 | 13 | p.P436R | 187·378 | MSS |
| CP70010543 | 13 | p.P436R | N/A | MSS |
| P189820 | 13 | p.P436S | 71·2 | MSS |
| RS21026290FFP | 13 | p.M444K | 218·34 | MSS |
| 579421A5 | 13 | p.M444K | 191·53 | MSS |
| RS22013912FFP | 13 | p.M444K | 179·46 | MSS |
| 9728-8 | 13 | p.M444K | N/A | MSS |
| RS21026291FFP | 14 | p.A456P | 329·01 | MSS |
| RS21026295FFP | 14 | p.A456P | 314·06 | MSS |
| CP60022091 | 14 | p.A456P | N/A | MSS |
| CP70003730 | 14 | p.A456P | N/A | MSS |
| CP70006042 | 14 | p.A456P | N/A | MSS |
| CP70024754 | 14 | p.A456P | N/A | MSS |
| CP70035349 | 14 | p.A456P | N/A | MSS |
| CP70036641 | 14 | p.A456P | 283·799 | MSS |
| CP70055075 | 14 | p.A456P | 168·715 | MSS |
| 47021 | 14 | p.A456P | 507·26 | MSS |
| RS1806307FFP | 14 | p.S459Y | 442 | MSS |
| RS21000403FFP | 14 | p.S459F | 235·29 | MSS |
| RS21003154FFP | 14 | p.S459F | 91·27 | MSS |
| RS21017731FFP | 14 | p.S459F | 294.12 | MSS |
| RS21026300FFP | 14 | p.S459F | 82·75 | MSS |
| RS21041495FFP | 14 | p.S459F | 161·52 | MSS |
| 238749-9 | 14 | p.S459F | 136·59 | MSS |
| CP70034940 | 14 | p.S459F | N/A | MSS |
| CP70035001 | 14 | p.S459F | 195·531 | MSS |
| CP70046280 | 14 | p.S459F | N/A | MSS |
| 164705 | 14 | p.S459F | 250·25 | MSS |

TMB, tumor mutation burden; MSS, microsatellite stable, MSI, microsatellite instable; N/A, not available

## Clinical characteristics of the POLEex dataset

**Supplementary Table 2 Clinicopathological characteristics of patients in the *POLEex* dataset**

|  | **MSS/TMB-L**  **(n=27)** | **MSI-H**  **(n = 19)** | **POLEmut**  **(n=14)** | **p value** |
| --- | --- | --- | --- | --- |
| Age | 60·9 (55·9 – 65·9) | 56·1 (49·0 – 63·1) | 48·1 (43·3 – 52·9) | 0·0007 |
| Gender  Male  Female | 14 (51·9%)  13 (48·1%) | 7 (36·8%)  12 (63·1%) | 9 (64.3%)  5 (35·7%) | 0·2871 |
| Primary tumor location  Right-side  Left-side | 8 (29·6%)  19 (70·4%) | 13 (68·4%)  6 (31·6%) | 9 (64.3%)  5 (35·7%) | 0·0165 |
| Histology  Adenocarcinoma  Mucinous/ signet-ring cell carcinoma | 24 (88·9%)  3 (11·1%) | 15 (78·9%)  4 (21·1%) | 11 (78·6%)  3 (11·4%) | 0·5793 |
| Tumor differentiation  Well/Mediate  Poor | 24 (88·9%)  3 (11·1%) | 13 (68·4%)  6 (31·6%) | 8 (57·1%)  6 (42·9%) | 0·0609 |
| Stage  Ⅰ/Ⅱ  Ⅲ  Ⅳ | 7 (25·9%)  16 (59·3%)  4 (14.8%) | 13 (68·4%)  5 (26·3%)  1 (5·3%) | 8 (57·1%)  3 (21·4%)  3 (21·4%) | 0·0295 |
| T stage  1/2  3  4 | 2 (7·4%)  14 (51·9%)  11 (40·7%) | 5 (26·3%)  13 (68·4%)  1 (5·3%) | 3 (21·4%)  9 (64.3%)  2 (14.3%) | 0·0428 |

## Detailed Performance of the proposed CDA-CLAM

As introduced in Section 3.4 of the main manuscript, the proposed CDA-CLAM model demonstrates good performance in both internal cross-validation and external prospective evaluation and in both the binary and ternary classification tasks. The detailed ROC curves and AUC values for each fold in cross-validation, and the performance of each fold’s model on the external evaluation dataset are shown in Supplementary Table 3 and Supplementary Figure 1 for the binary classification task, and Supplementary Table 4 and Supplementary Figure 2. for the ternary classification task.

**Supplementary Table** **3 Detailed cross-validation and external validation performance for CDA-CLAM in the binary classification task**

|  | **Internal** | | **External** | |
| --- | --- | --- | --- | --- |
|  | **AUC** | **Accuracy** | **AUC** | **Accuracy** |
| Avg | 0·9543  (0·9376 - 0·9710) | 0·8775  (0·8489 - 0·9060) | 0·8676  (0·7687 - 0·9665) | 0·8333  (0·7390 - 0·9276) |
| Fold 0 | 0·9882  (0·9715 - 1·0000) | 0·9510  (0·9091 - 0·9929) | 0·8631  (0·7626 - 0·9636) | 0·8000  (0·6988 - 0·9012) |
| Fold 1 | 0·9412  (0·8970 - 0·9853) | 0·8431  (0·7726 - 0·9137) | 0·8676  (0·7674 - 0·9678) | 0·8000  (0·6988 - 0·9012) |
| Fold 2 | 0·9520  (0·9172 - 0·9868) | 0·8515  (0·7821 - 0·9208) | 0·8721  (0·7756 - 0·9686) | 0·8333  (0·7390 - 0·9276) |
| Fold 3 | 0·9144  (0·8614 - 0·9675) | 0·8200  (0·7447 - 0·8953) | 0·8698  (0·7706 - 0·9690) | 0·8000  (0·6988 - 0·9012) |
| Fold 4 | 0·9629  (0·9283 - 0·9974) | 0·9208  (0·8681 - 0·9735) | 0·8608  (0·7590 - 0·9627) | 0·7833  (0·6791 - 0·8876) |


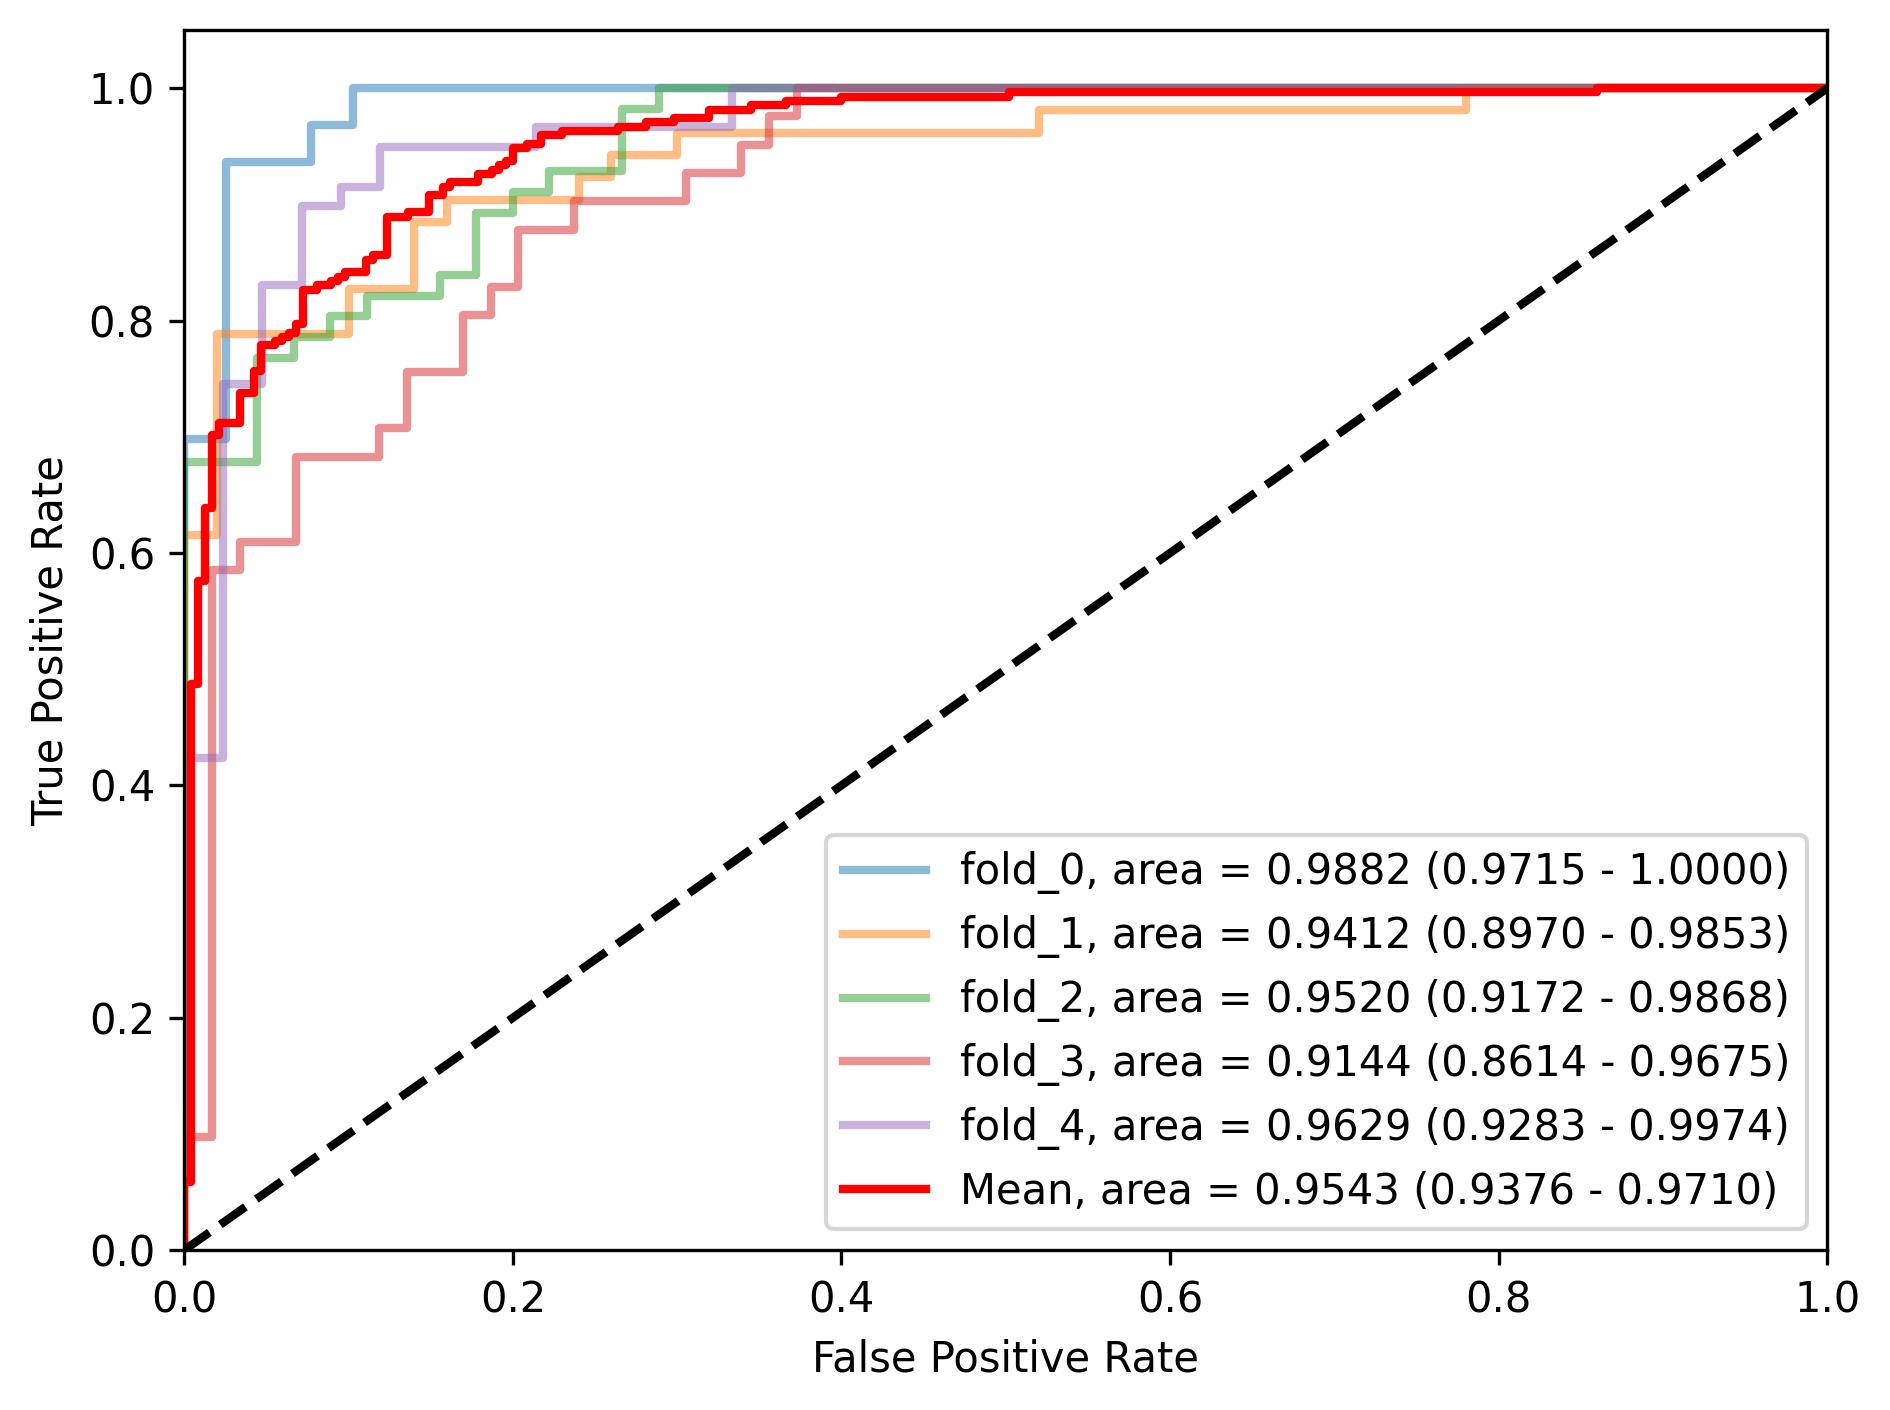

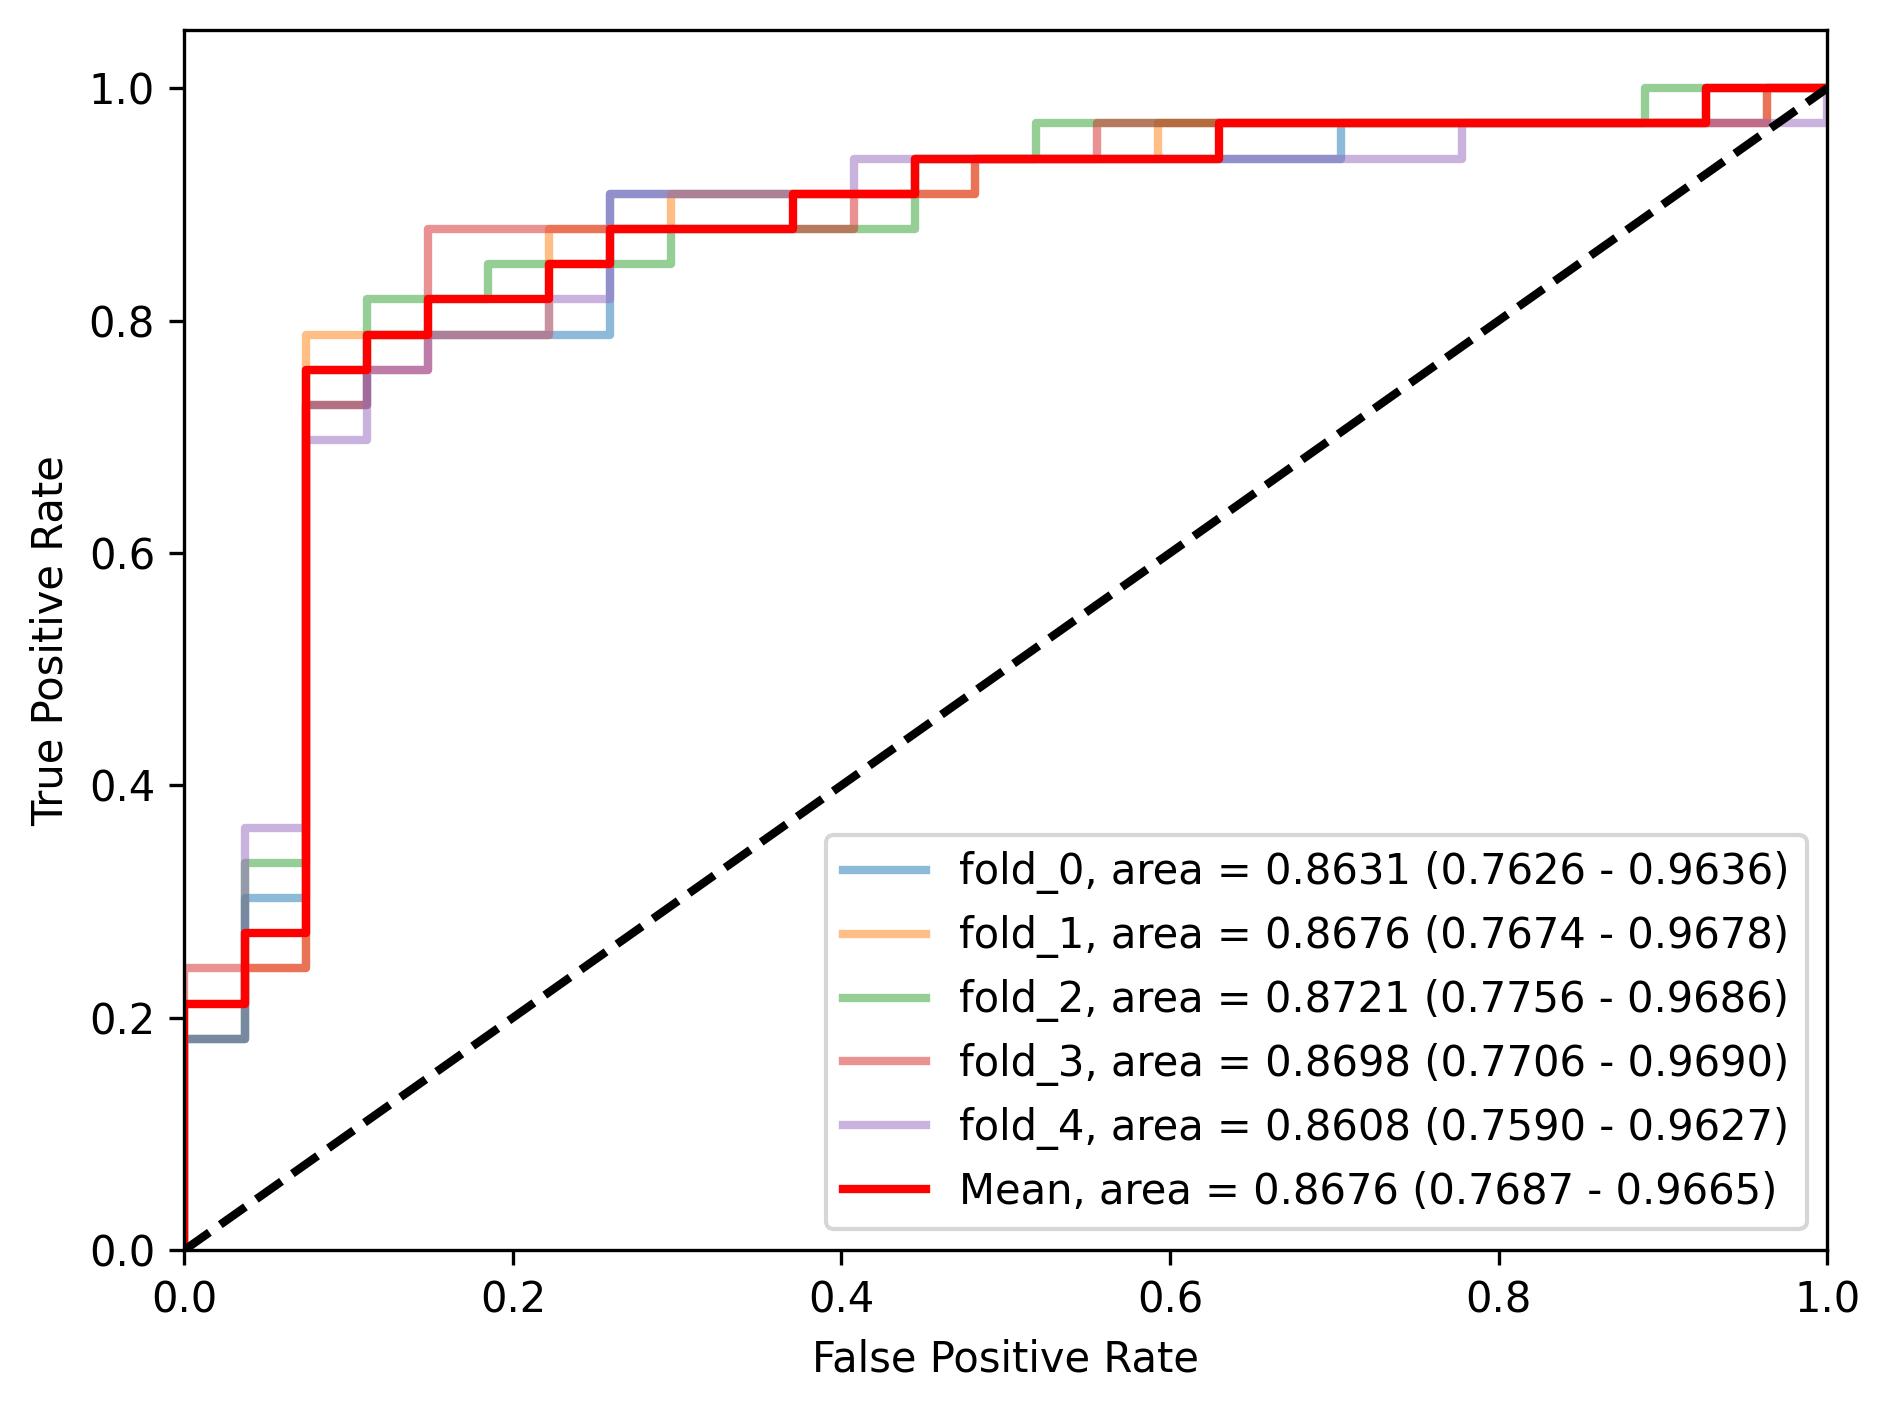


(a) Internal cross-validation (b) External evaluation

Supplementary Figure 1 The ROC curves and the AUC values for CDA-CLAM in the binary classification task

**Supplementary Table 4 Detailed cross-validation and external validation performance for CDA-CLAM in the ternary classification task**

|  | **Internal** | | **External** | |
| --- | --- | --- | --- | --- |
|  | **AUC** | **Accuracy** | **AUC** | **Accuracy** |
| Avg | 0·9638  (0·9453-0·9823) | 0·8880  (0·8614-0·9147) | 0·9323  (0·8693-0·9932) | 0·8778  (0·7965-0·9590) |
| Fold 0 | 0·9890  (0·9699-1·0000) | 0·9281  (0·8796-0·9766) | 0·9056  (0·8290-0·9798) | 0·8333  (0·7428-0·9239) |
| Fold 1 | 0·9661  (0·9261-0·9992) | 0·9085  (0·8536-0·9634) | 0·8981  (0·8181-0·9778) | 0·8111  (0·7130-0·9092) |
| Fold 2 | 0·9662  (0·9408-0·9909) | 0·8944  (0·8391-0·9496) | 0·8790  (0·7804-0·9775) | 0·8444  (0·7539-0·9350) |
| Fold 3 | 0·9409  (0·8890-0·9928) | 0·8533  (0·7854-0·9212) | 0·9257  (0·8611-0·9876) | 0·8889  (0·8120-0·9658) |
| Fold 4 | 0·9580  (0·9152-0·9990) | 0·8548  (0·7880-0·9216) | 0·9396  (0·8806-0·9963) | 0·8889  (0·8094-0·9683) |
| Class 0  (MSS) | 0·9663  (0·9520-0·9806) | 0·8597  (0·8294-0·8899) | 0·9091  (0·8338-0·9844) | 0·8500  (0·7597-0·9403) |
| Class 1  (MSI-H) | 0·9524  (0·9303-0·9746) | 0·8538  (0·8230-0·8845) | 0·9204  (0·8458-0·9951) | 0·8500  (0·7597-0·9403) |
| Class 2  (POLE) | 0·9727  (0·9536-0·9918) | 0·9506  (0·9317-0·9695) | 0·9674  (0·9283-1·0000) | 0·9333  (0·8702-0·9965) |


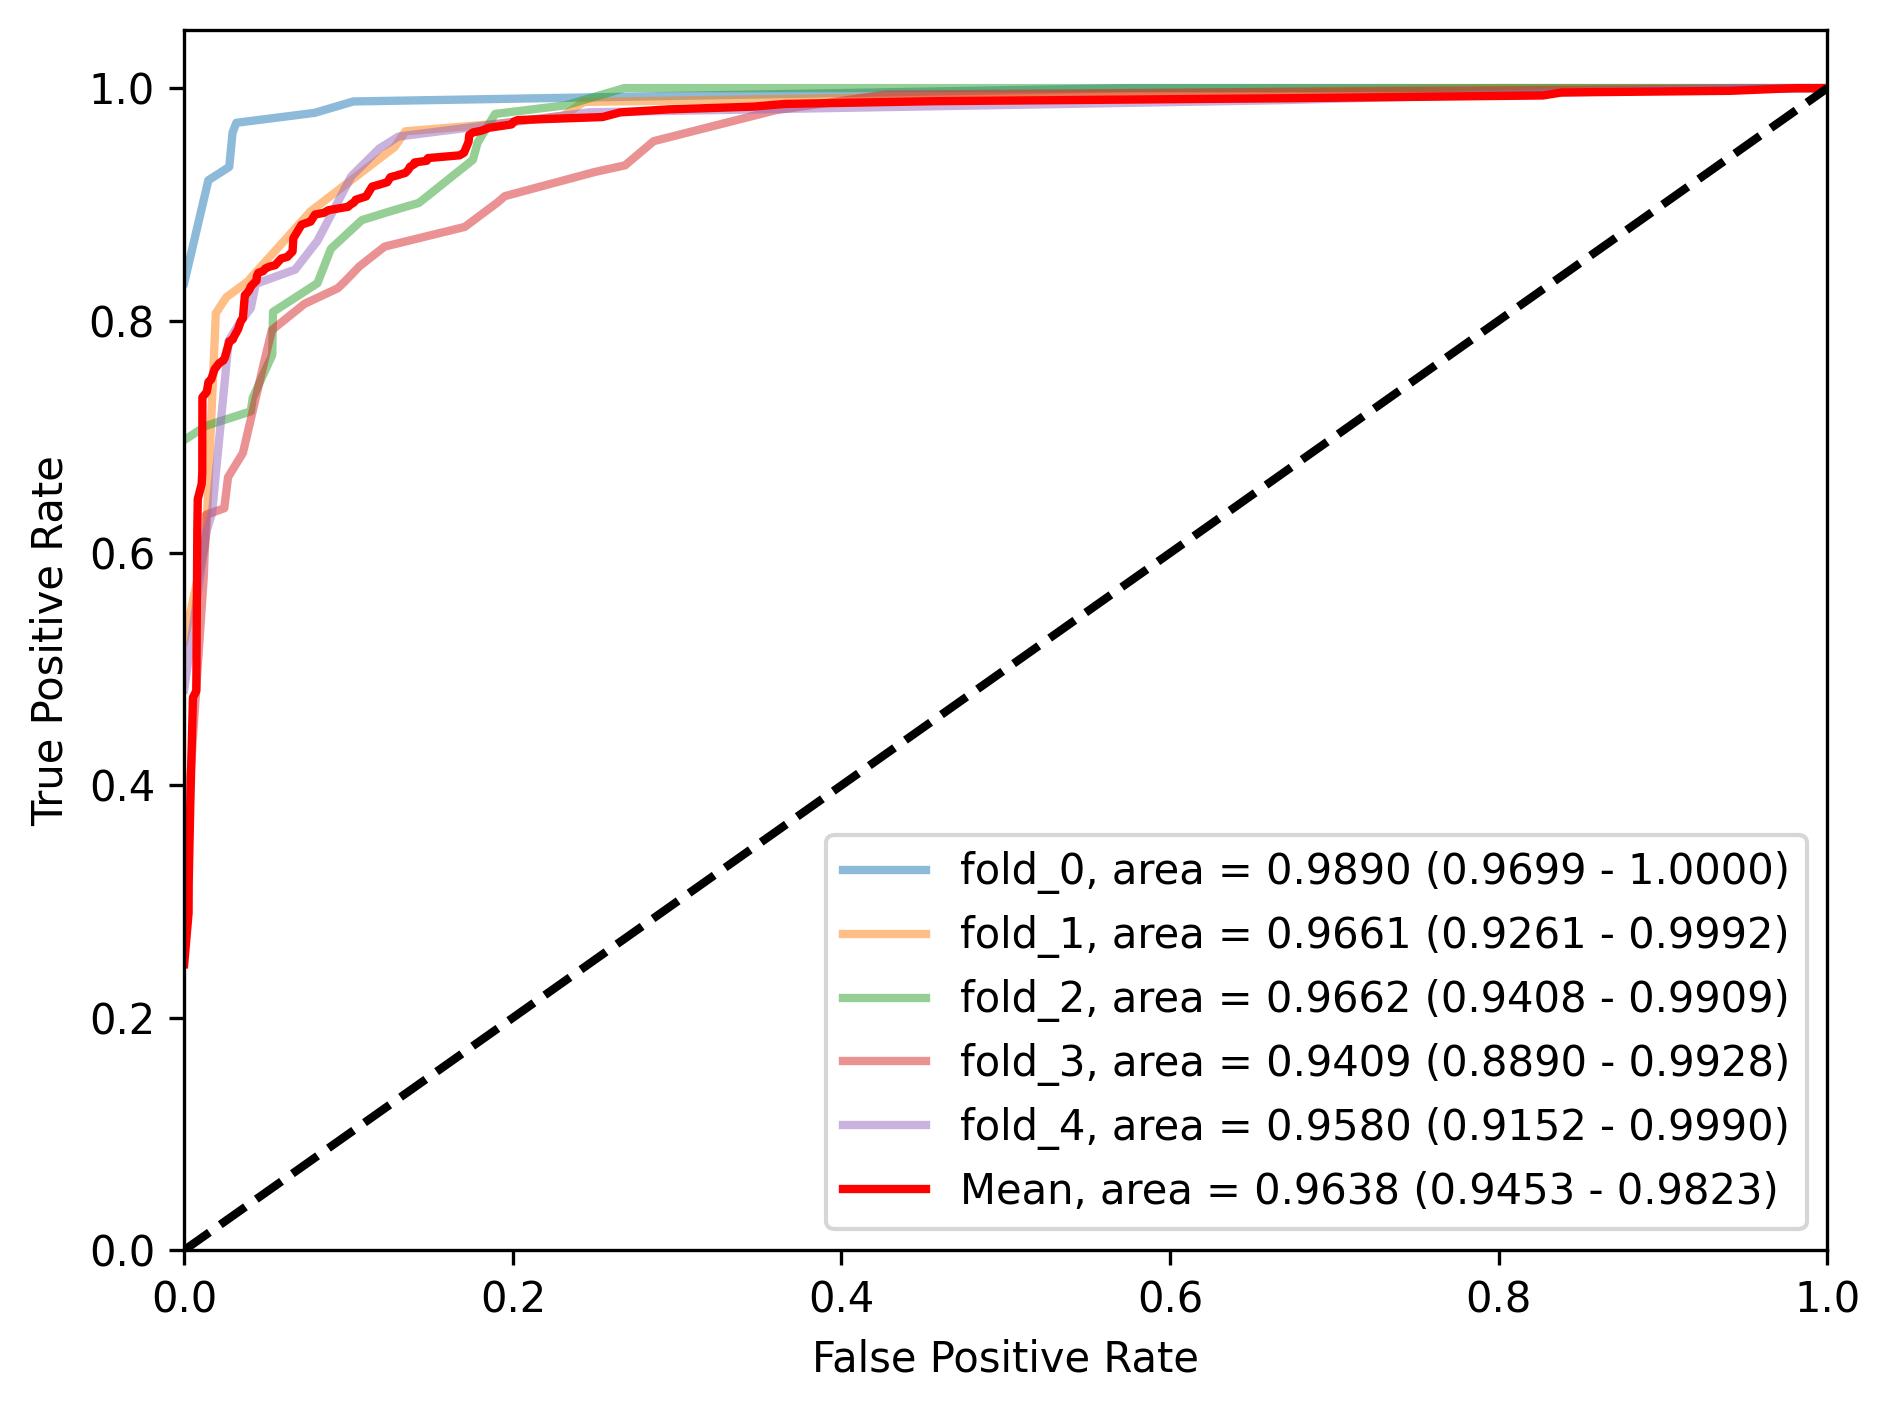

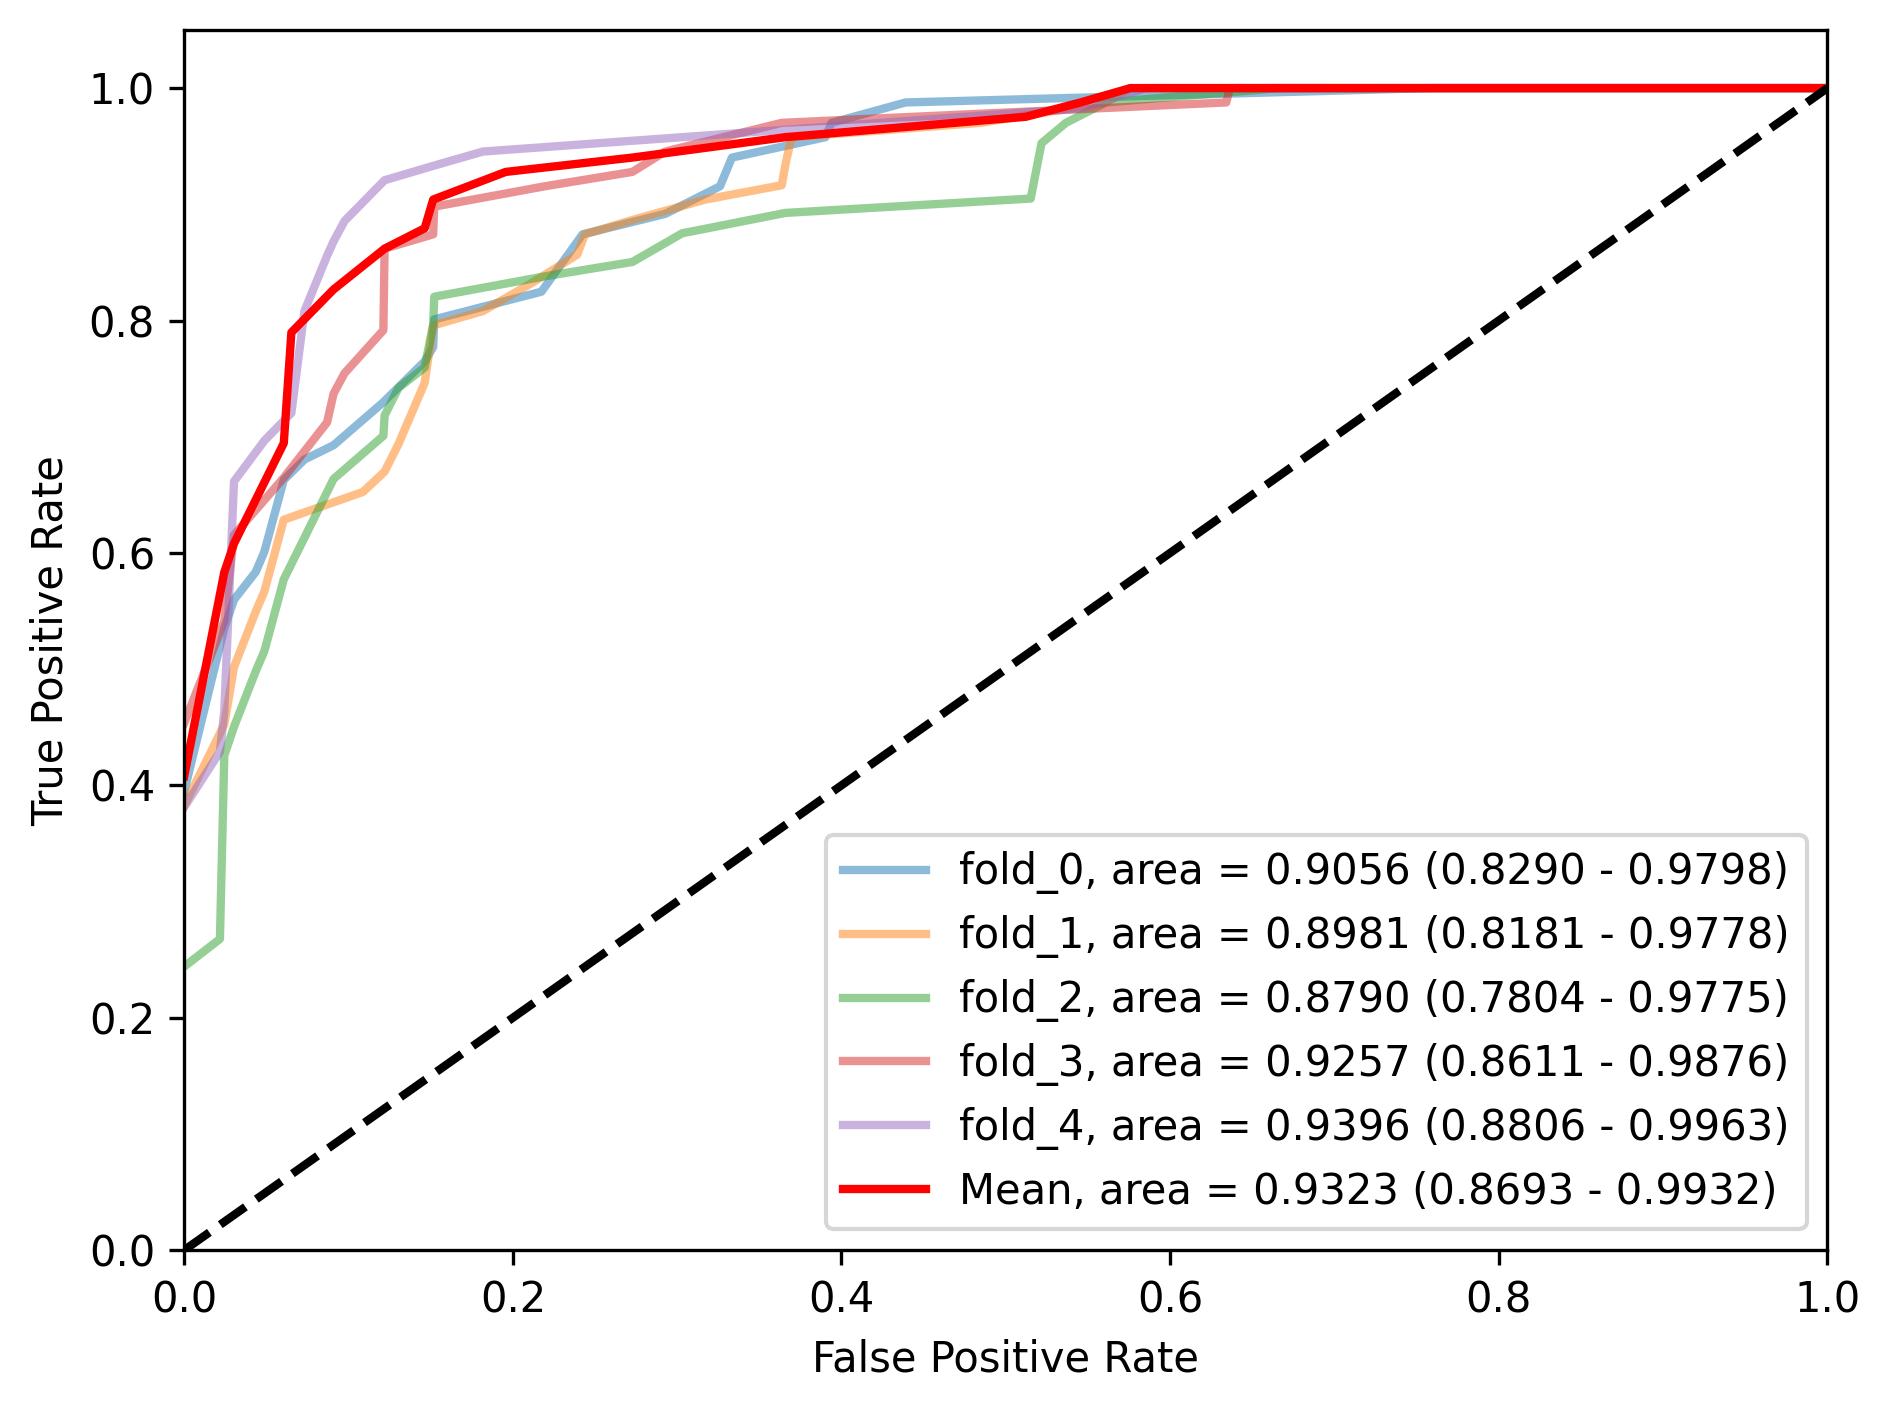


(a) Internal cross-validation,

per-fold results

(b) External evaluation,

per-fold results


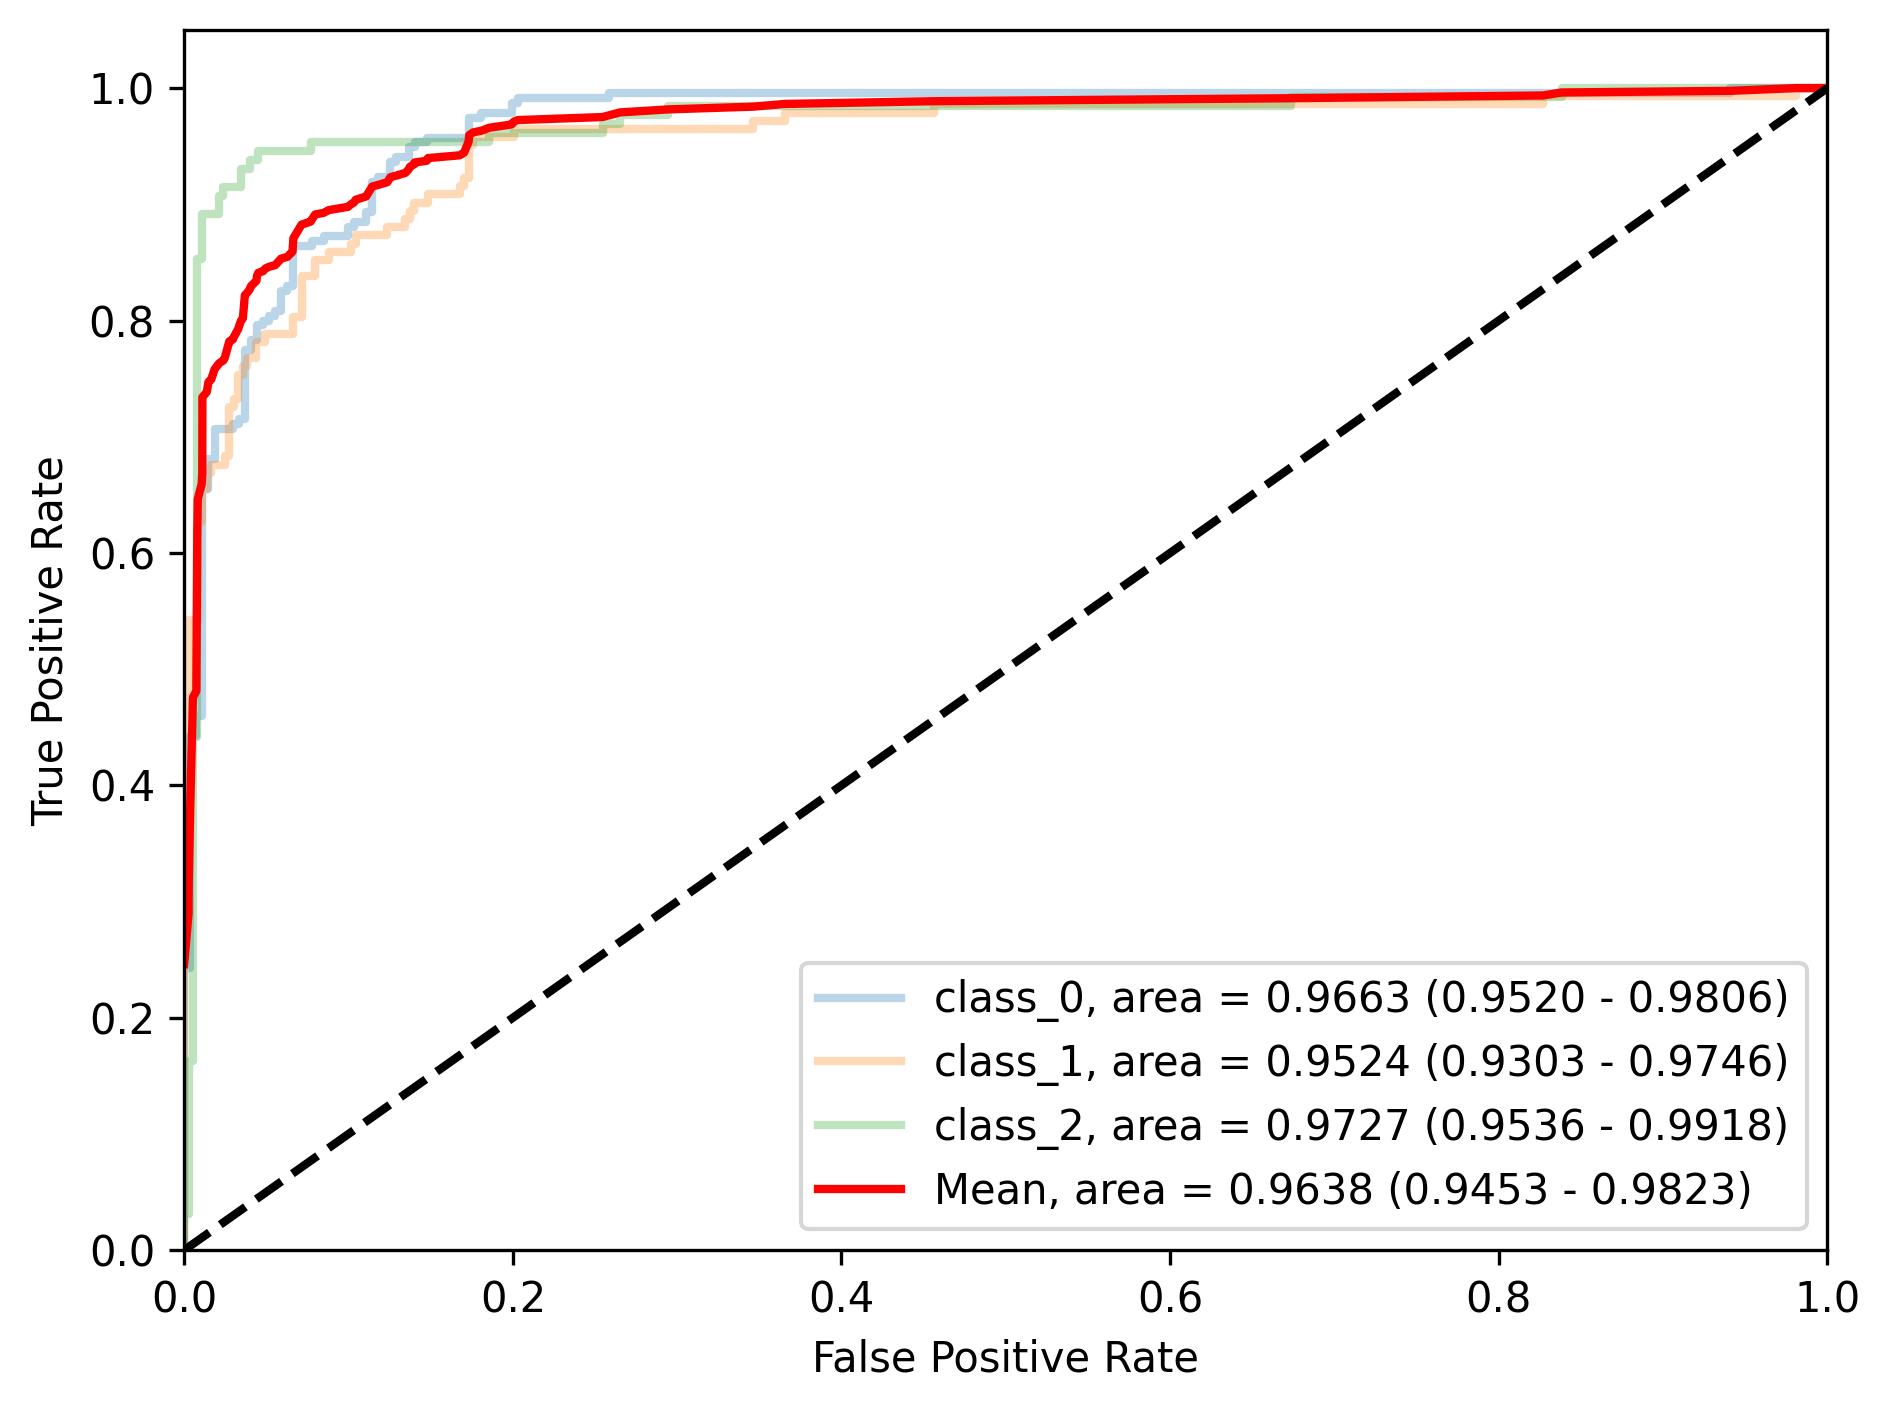

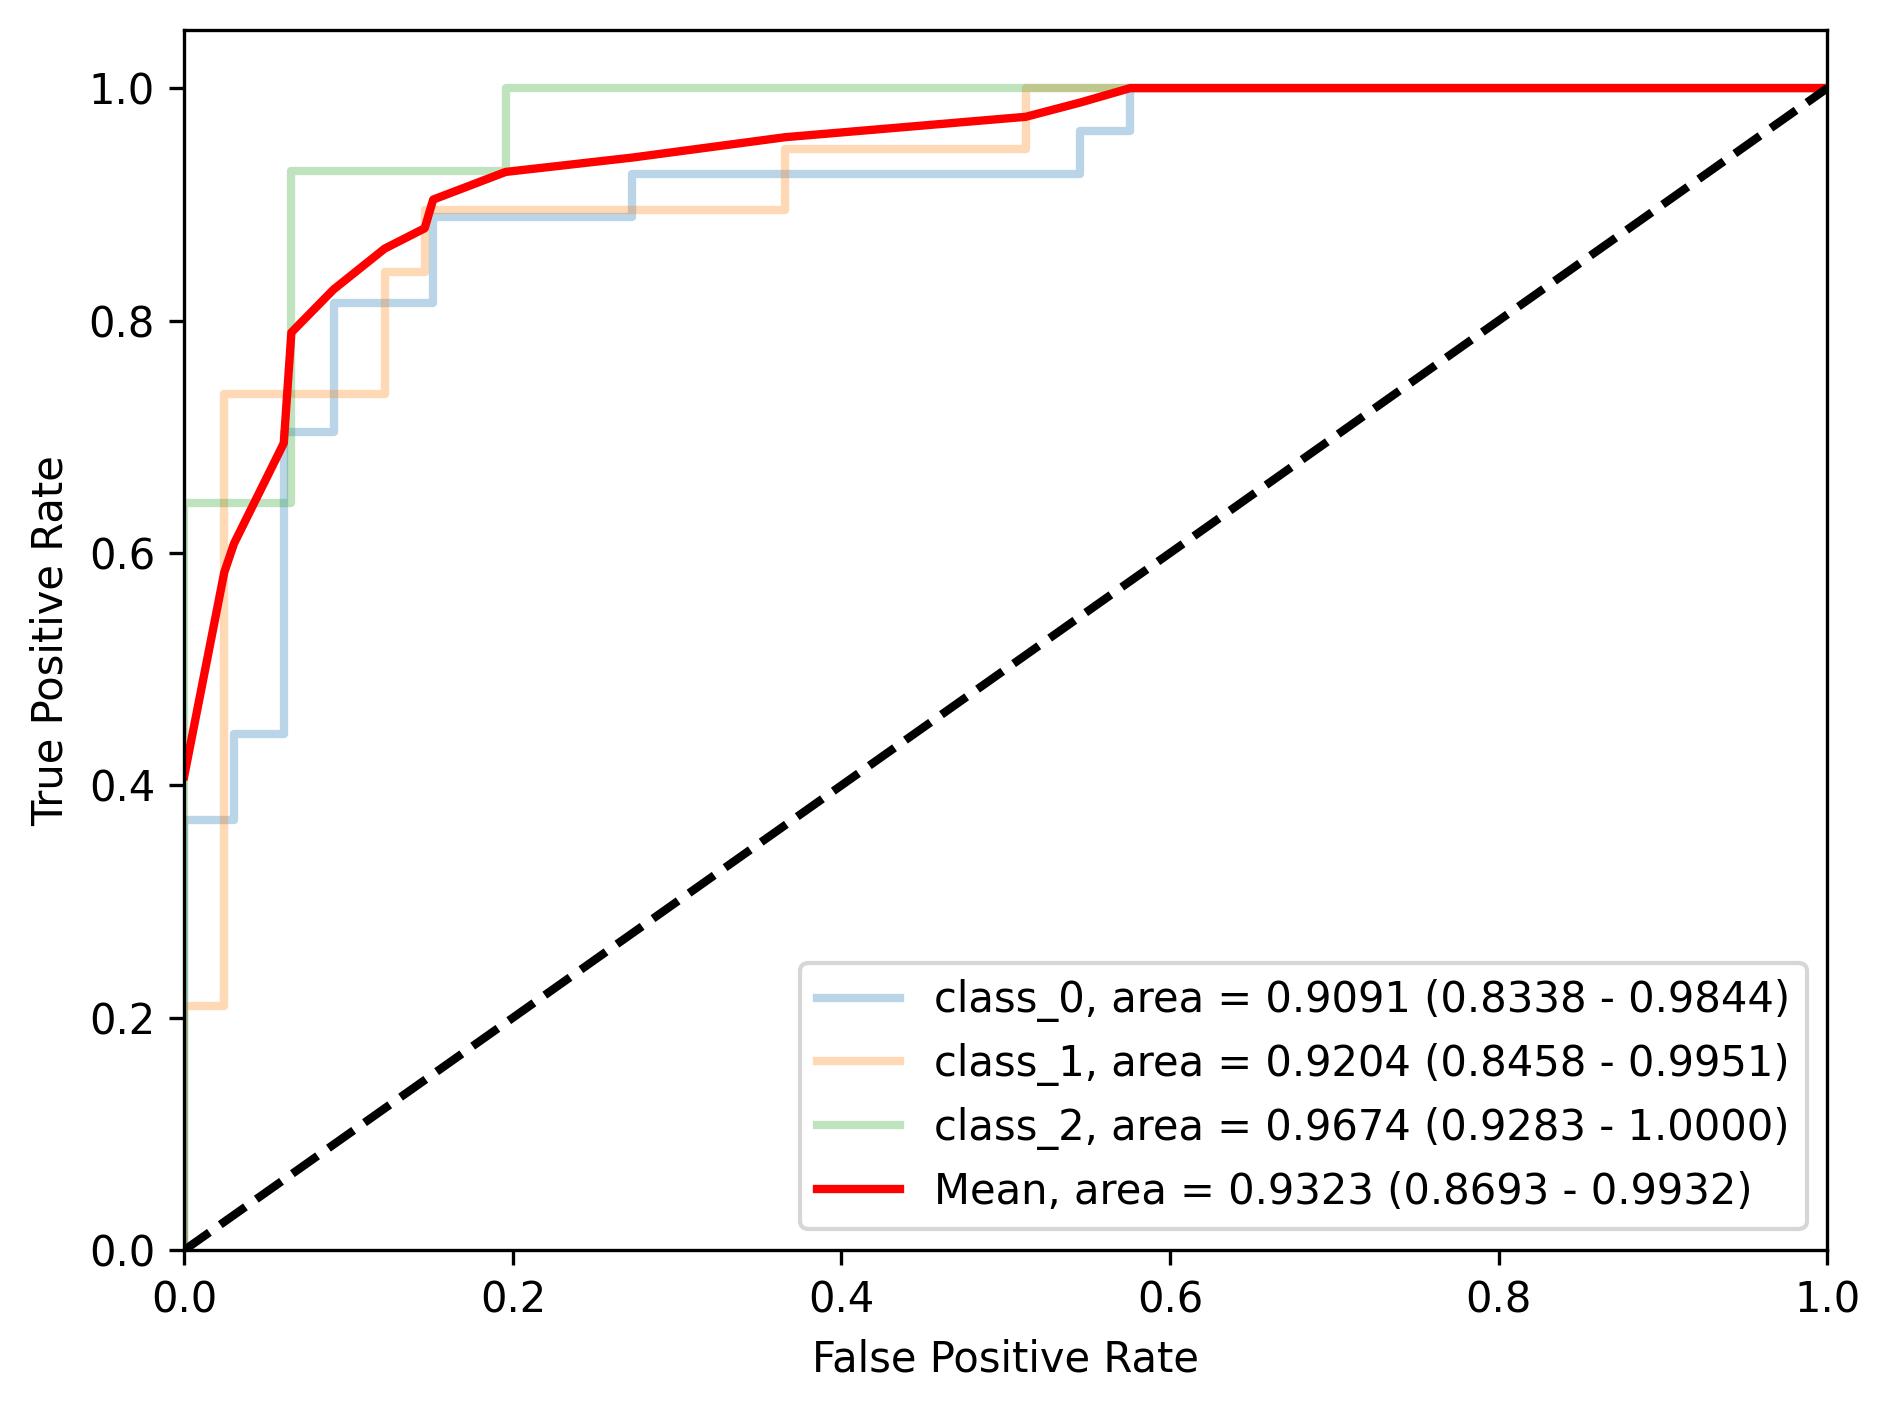


(c) Internal cross-validation,

per-class results

(d) External evaluation,

per-class results

Supplementary Figure 2 The ROC curves and the AUC values for CDA-CLAM in the ternary classification task

## Subgroup analysis of CDA-CLAM model

Colorectal cancer is a highly heterogeneous disease. Subgroup analysis was performed to validate the robustness of the CDA-CLAM classifier. Performance of the ternary and binary CDA-CLAM models remained unaffected by patient gender, primary tumor site, tumor differentiation, clinical stage, or pathological subtype. Notably, the subgroup with T4-stage tumors exhibits a higher AUC, which can be attributed to the model's ability to capture more extensive imaging information from T4-stage tumors compared to those at T1-3 stages.


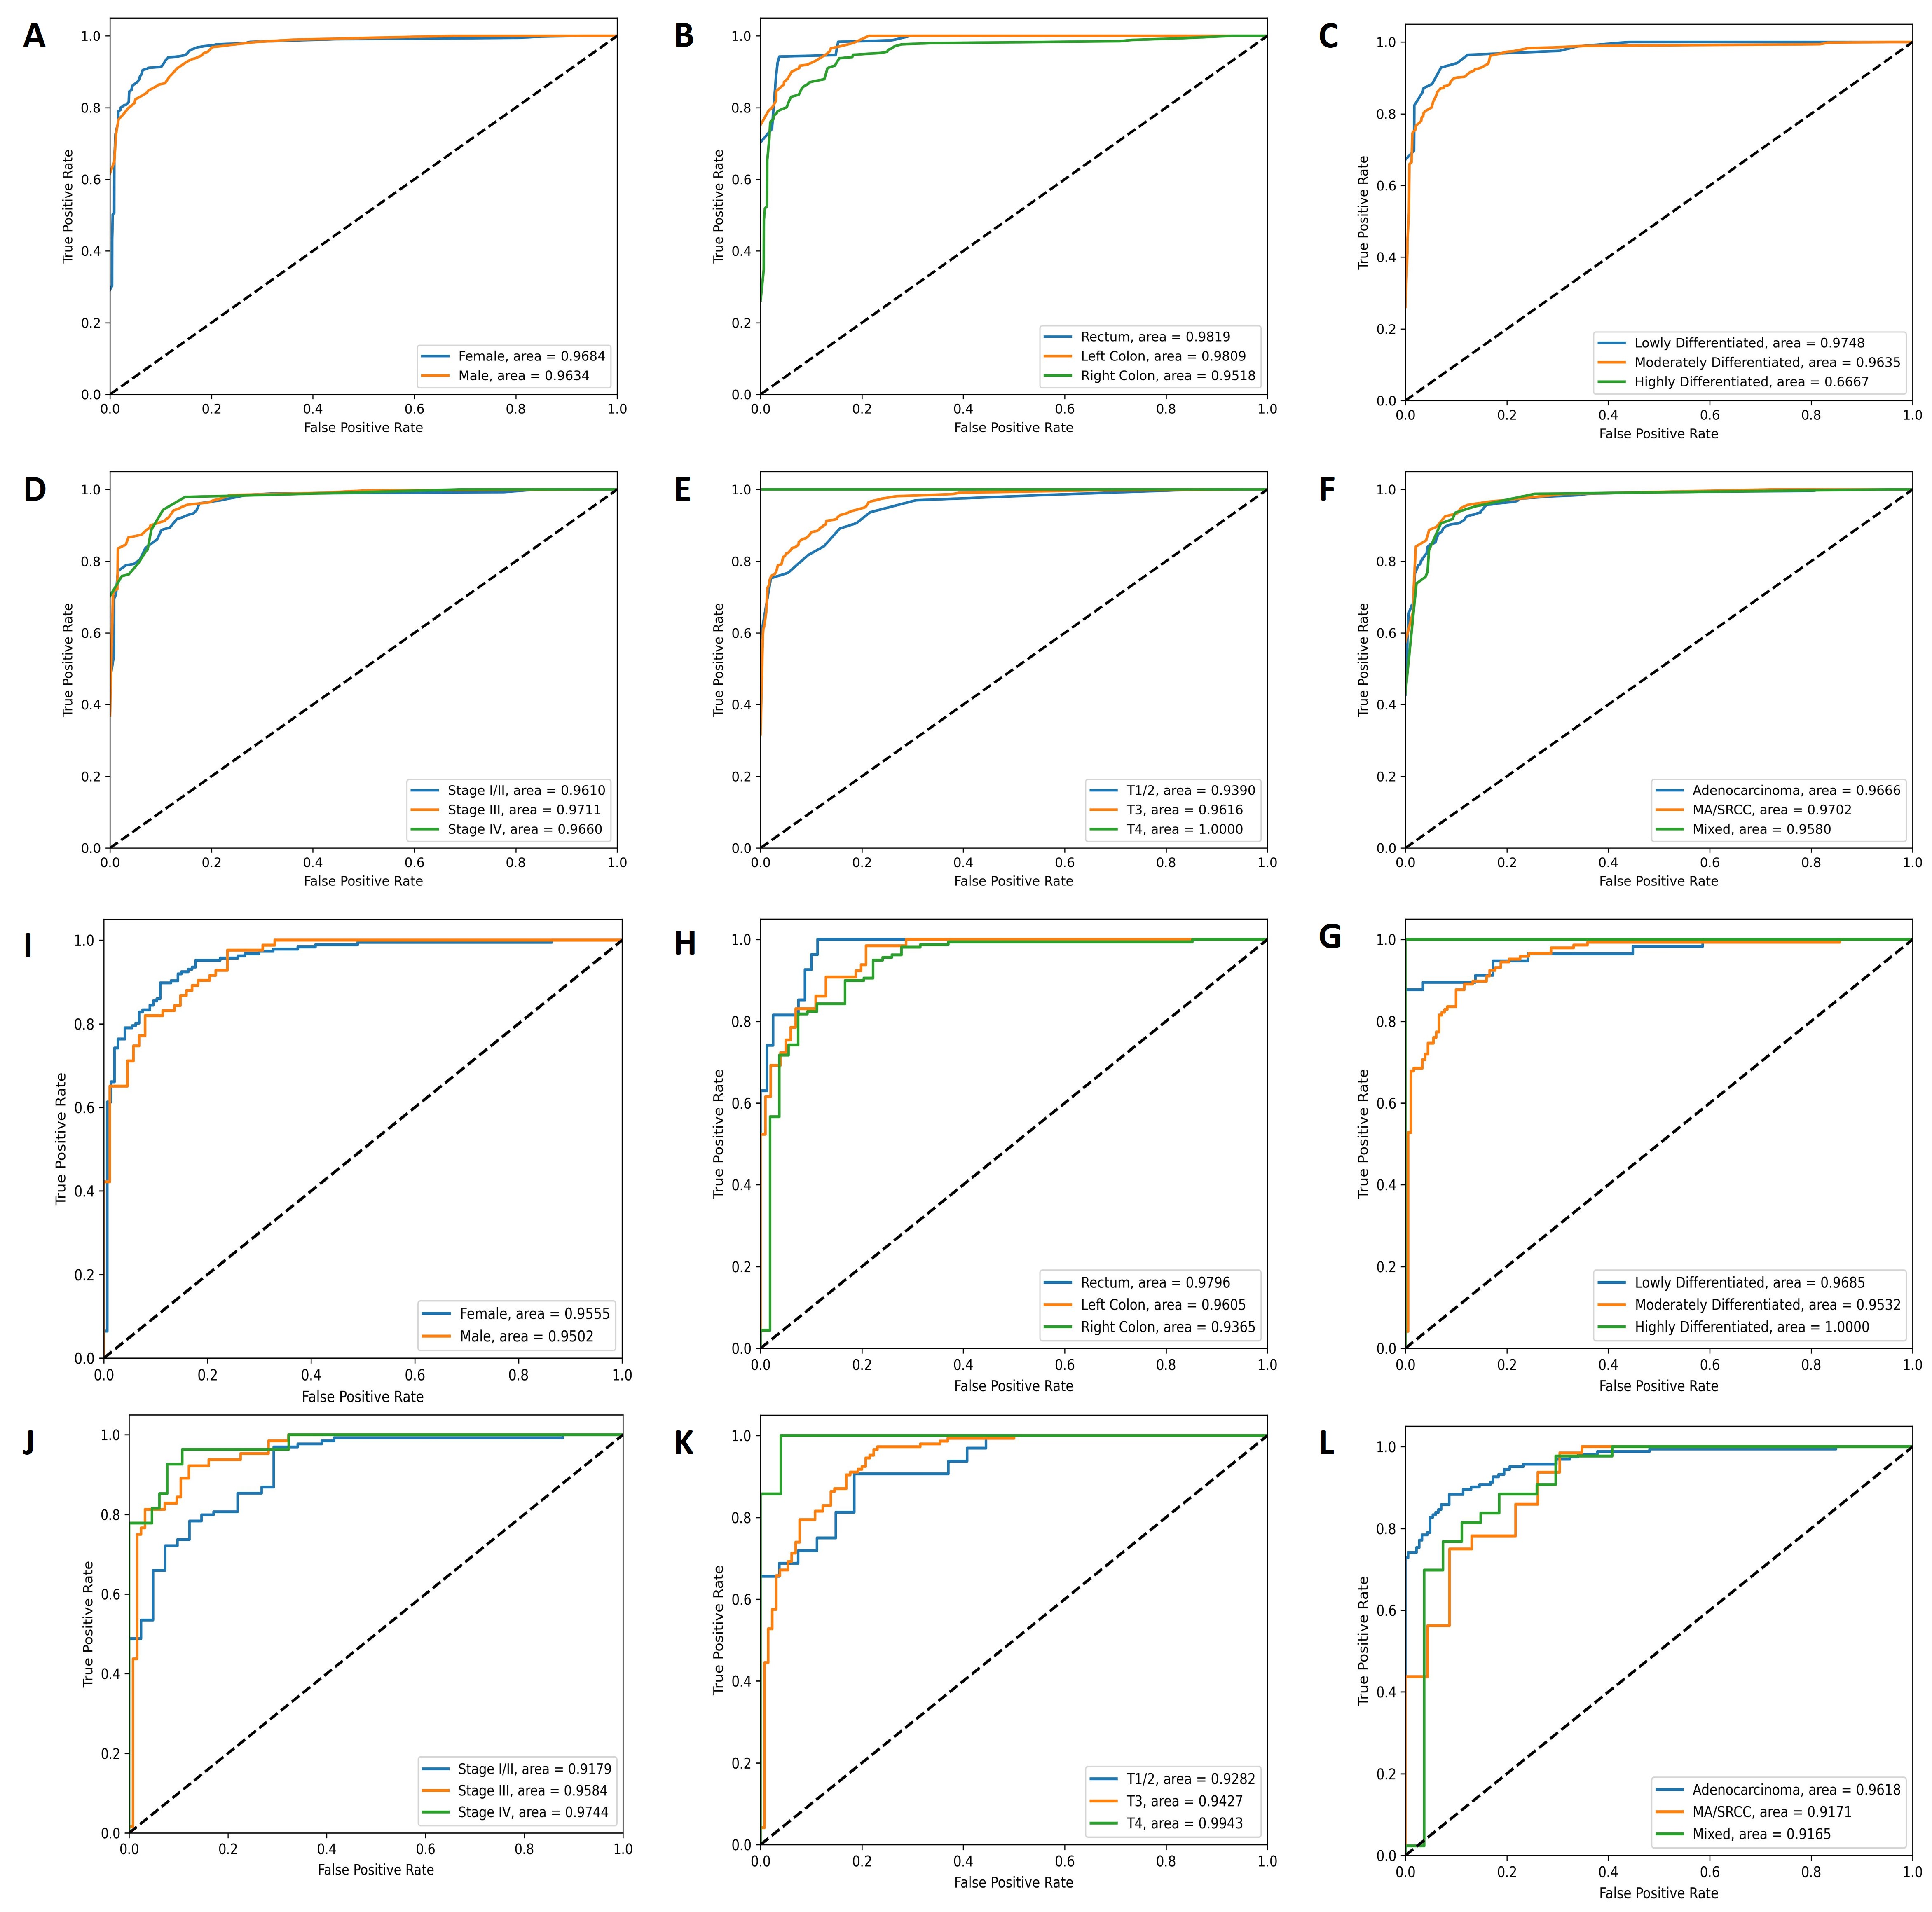


Supplementary Figure 3 Subgroup AUC of the ternary CDA-CLAM models (A to F) and the binary CDA-CLAM model (G to L)
